# Supplementary material for: The fallacy of enrolling only high-risk subjects in cancer prevention trials: Is there a "free lunch"?
Source: PubMed Central journal article supplement (PMC524373; doi:10.1186/1471-2288-4-24), 2004-10-04
Supplement: 1471-2288-4-24-S1.pdf [file 1471-2288-4-24-S1.pdf]

## Appendix A.

Worked-out calculations of power. The calculations are based on more significant digits than are displayed.

### Power with $p_C = .02$ and $p_1 = .01$

Risk Difference

$$\Delta_1 = .02 - .01 = .01,$$

$$p = (.02 + .01)/2 = .015$$

$$se_{1Null} = \sqrt{2(.015)(1-.015)} = .1719$$

$$se_{1Alt} = \sqrt{.02(1-.02) + .01(1-.01)} = .1718$$

$$z = (.01 / \sqrt{2000} - 1.96 \times .1719) / .1718 = .642$$

$$\text{power} = \text{NormalCDF}(.642) = .74$$

Relative risk

$$\Delta_2 = \text{Log}(.02/.01) = .69,$$

$$p = (.02 + .01)/2 = .015$$

$$se_{2Null} = \sqrt{2(1-.015)/.015} = 11.46$$

$$se_{2Alt} = \sqrt{(1-.02)/.02 + (1-.01)/.01} = 12.17$$

$$z = (.69 \sqrt{2000} - 1.96 \times 11.46) / 12.17 = .70$$

$$\text{power} = \text{NormalCDF}(.70) = .76$$

### Power with $p_C = .04$ and $p_1 = .02$

Risk Difference

$$\Delta_1 = .04 - .02 = .02,$$

$$p = (.04 + .02)/2 = .03$$

$$se_{1Null} = \sqrt{2(.03)(1-.03)} = .24$$

$$se_{1Alt} = \sqrt{.04(1-.04) + .02(1-.02)} = .24$$

$$z = (.02 / \sqrt{2000} - 1.96 \times .26) / .26 = 1.75$$

$$\text{power} = \text{NormalCDF}(1.75) = .96$$

Relative risk

$$\Delta_2 = \text{Log}(.04/.02) = .69,$$

$$p = (.04 + .02)/2 = .03$$

$$se_{2Null} = \sqrt{2(1 - .03) / .03} = 8.04$$

$$se_{2Alt} = \sqrt{(1-.04)/.04 + (1-.02)/.02} = 8.54$$

$$z = (.69 \sqrt{2000} - 1.96 \times 8.04) / 8.54 = 1.78$$

$$\text{power} = \text{NormalCDF}(1.78) = .96$$

**Power with  $p_C = .04$  and  $p_I = .03$**

Risk Difference

$$\Delta_1 = .04 - .03 = .01,$$

$$p = (.04 + .03)/2 = .035$$

$$se_{1Null} = \sqrt{2(.035)(1 - .035)} = .26$$

$$se_{1Alt} = \sqrt{.04(1-.04) + .03(1-.03)} = .26$$

$$z = (.01 / \sqrt{2000} - 1.96 \times .26) / .26 = -.2394$$

$$\text{power} = \text{NormalCDF}(-.2394) = .41$$

Relative risk

$$\Delta_2 = \text{Log}(.04/.03) = .288,$$

$$p = (.04 + .03)/2 = .035$$

$$se_{2Null} = \sqrt{2(1 - .035) / .035} = 7.42$$

$$se_{2Alt} = \sqrt{(1-.04)/.04 + (1-.03)/.03} = 7.51$$

$$z = (.288 \sqrt{2000} - 1.96 \times 7.42) / 7.51 = -.225$$

$$\text{power} = \text{NormalCDF}(-.225) = .42$$
