# Supplementary material for: The fallacy of enrolling only high-risk subjects in cancer prevention trials: Is there a "free lunch"?
Source: PubMed Central journal article supplement (PMC524373; doi:10.1186/1471-2288-4-24), 2004-10-04
Supplement: 1471-2288-4-24-S2.pdf [file 1471-2288-4-24-S2.pdf]

## Appendix B

Let  $n_{ij0}$  denote the number in risk group  $i$  ( $i = 1, 2, \dots, k$ ) and arm  $j$  ( $j = 0 = \text{placebo}$ ,  $j = 1 = \text{tamoxifen}$ ) without invasive breast cancer. Let  $n_{ij1}$  denote the total number in risk group  $i$  and arm  $j$  with invasive breast cancer. The likelihood kernel for the general formulation is

$$\begin{aligned} L = & \prod_i (1 - \text{pr}(\text{invasive breast cancer} \mid \text{placebo, group } i))^{n_{i00}} \\ & \times \text{pr}(\text{invasive breast cancer} \mid \text{placebo, group } i)^{n_{i01}} \\ & \times (1 - \text{pr}(\text{invasive breast cancer} \mid \text{tamoxifen, group } i))^{n_{i10}} \\ & \times \text{pr}(\text{invasive breast cancer} \mid \text{tamoxifen, group } i)^{n_{i11}}. \end{aligned}$$

Recall that  $\pi_i = \text{pr}(\text{invasive breast cancer} \mid \text{placebo, group } i)$ . Let  $\delta$  denote the absolute risk difference which is constant over risk groups. The kernel of the log-likelihood for the *Constant RD* model is

$$\begin{aligned} L_{\text{ConstantRD}}(\pi_i, \delta) = & \sum_{i=1}^k n_{i00} \text{Log}(1 - \pi_i) + \sum_{i=1}^k n_{i01} \text{Log}(\pi_i) \\ & + \sum_{i=1}^k n_{i10} \text{Log}(1 - \pi_i + \delta) + \sum_{i=1}^k n_{i11} \text{Log}(\pi_i - \delta). \end{aligned}$$

Let  $\beta$  denote the relative risk which is constant over risk groups. The kernel of the log-likelihood for the *Constant RR* model is

$$\begin{aligned} L_{\text{ConstantRR}}(\pi_i, \beta) = & \sum_{i=1}^k n_{i00} \text{Log}(1 - \pi_i) + \sum_{i=1}^k n_{i01} \text{Log}(\pi_i) \\ & + \sum_{i=1}^k n_{i10} \text{Log}(1 - \pi_i/\beta) + \sum_{i=1}^k n_{i11} \text{Log}(\pi_i/\beta). \end{aligned}$$

The above log-likelihoods were maximized using a Newton-Raphson algorithm with starting values of  $\pi_i = n_{i11}/n_{i1+}$ ,  $\delta = \sum_i (n_{i01}/n_{i0+} - n_{i11}/n_{i1+})/k$ , and  $\beta = \sum_i ((n_{i01}/n_{i0+}) / (n_{i11}/n_{i1+})) / k$ , where "+" indicates summation over the indicated subscript. Confidence intervals are based on the asymptotic variance computed via the observed information matrix.

For the full model the estimates are  $\hat{\delta}_i = n_{i01}/n_{i0+} - n_{i11}/n_{i1+}$  and  $\hat{\beta}_i = (n_{i01}/n_{i0+}) / (n_{i11}/n_{i1+})$ . Confidence intervals are based on the asymptotic variance for binomial distributions. The maximized log-likelihood for both *Varying RD* and *Varying RR* models is

$$L_{VaryingRD}(\hat{\pi}_i, \hat{\delta}_i) = L_{VaryingRR}(\hat{\pi}_i, \hat{\beta}_i) = \\ \sum_{i=1}^k n_{i00} \text{Log}(n_{i00}/n_{i0+}) + \sum_{i=1}^k n_{i01} \text{Log}(n_{i01}/n_{i0+}) \\ + \sum_{i=1}^k n_{i10} \text{Log}(n_{i10}/n_{i1+}) + \sum_{i=1}^k n_{i11} \text{Log}(n_{i11}/n_{i1+}).$$

Based on an asymptotic chi-squared distribution, p-values for comparing models are computed for  $2(L_{VaryingRD}(\hat{\pi}_i, \hat{\delta}_i) - L_{ConstantRD}(\hat{\pi}_i, \hat{\delta}))$  and  $2(L_{VaryingRR}(\hat{\pi}_i, \hat{\beta}_i) - L_{ConstantRD}(\hat{\pi}_i, \hat{\beta}))$ .
